# Supplementary material for: Galectin-1 Inhibitor OTX008 Induces Tumor Vessel Normalization and Tumor Growth Inhibition in Human Head and Neck Squamous Cell Carcinoma Models
Source: MDPI journal article supplement (doi:10.3390/ijms18122671), 2017-12-09
Supplement: s1 [file s1]

## Supplemental Information

Communication

# Galectin-1 Inhibitor OTX008 Induces Tumor Vessel Normalization and Tumor Growth Inhibition in Human Head and Neck Squamous Cell Carcinoma Models

Nathan A. Koonce <sup>1,2</sup>, Robert J. Griffin <sup>1,\*</sup>, and Ruud P. M. Dings <sup>1,\*</sup>

<sup>1</sup> Department of Radiation Oncology, University of Arkansas for Medical Sciences, Little Rock, 72205 AR, USA

<sup>2</sup> National Center for Toxicological Research, Food and Drug Administration, Jefferson, 72079 AR, USA; Nathan.Koonce@fda.hhs.gov

\* Correspondence: rjgriffin@uams.edu (R.J.G.); rpmdings@uams.edu (R.P.M.D.);  
Tel.: +1-501-526-7873 (R.J.G.); +1-501-526-7876 (R.P.M.D.); Fax: +1-501-526-5934 (R.J.G.);  
+1-501-526-5934 (R.P.M.D.)

Received: 6 November 2017; Accepted: 5 December 2017; Published: 9 December 2017

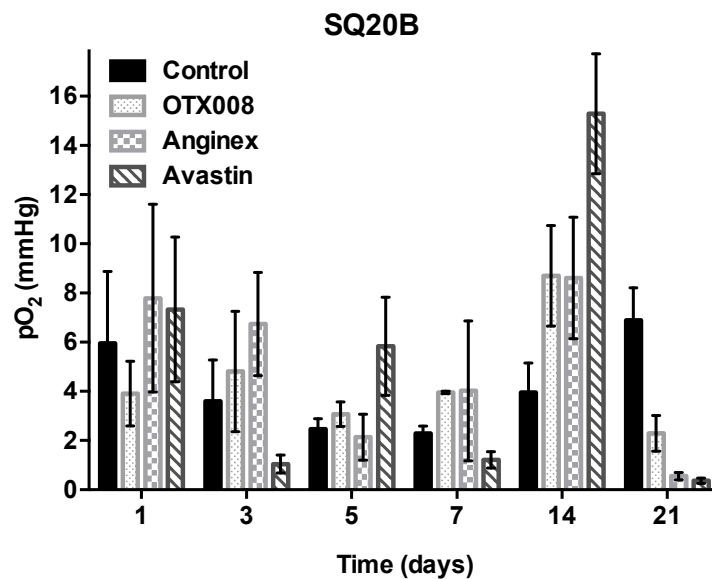

**Figure S1.** The effect of OTX008, Anginex and Avastin on global SQ20B tumor  $pO_2$  over time. Points, average mean ( $\pm$  SEM)  $pO_2$  value derived from the stabilized reading over a 60 seconds period at one location (4–7 mice per day per experimental group).

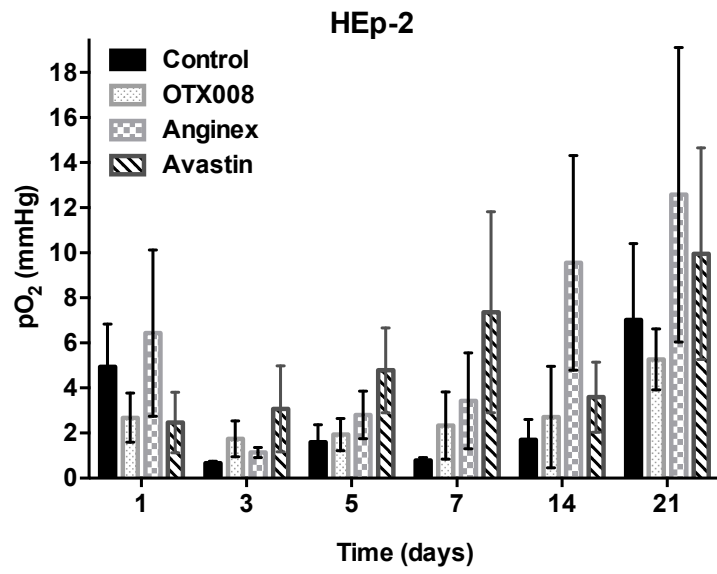

**Figure S2.** The effect of OTX008, Anginex and Avastin on global HEP-2 tumor  $pO_2$  over time. Points, average mean ( $\pm$  SEM)  $pO_2$  value derived from the stabilized reading over a 60 seconds period at one location (4–7 mice per day per experimental group).
